# Supplementary material
Source: MDPI journal article supplement (https://www.mdpi.com/2073-4395/12/1/8)
Supplement: s1 [file s1]

**Table S1:** Effect of fertiliser treatment on mean grass DM yield, over three cuts of the first year (2018) of the growth trial.

| Treatment      | First cut                     | Second cut                 | Third cut                     |
|----------------|-------------------------------|----------------------------|-------------------------------|
| DM yield kg/ha |                               |                            |                               |
| Eco P          | 4104.1 <sup>ab</sup> (411.4)  | 132.83 <sup>a</sup> (32.6) | 350.00 <sup>b</sup> (137.6)   |
| Eco P Comp     | 6443.60 <sup>ab</sup> (883.6) | 224.47 <sup>a</sup> (15.4) | 1636.25 <sup>ab</sup> (306.4) |
| C Comp         | 7052.93 <sup>a</sup> (892.1)  | 265.11 <sup>a</sup> (46.5) | 2521.50 <sup>a</sup> (580.3)  |
| Control        | 3854.29 <sup>b</sup> (307.6)  | 166.64 <sup>a</sup> (23.4) | 283.33 <sup>b</sup> (84.5)    |

Within each column (harvests) shared letters denote no statistical difference occurring at  $p > 0.05$ , data was analysed using a repeated measure one-way analysis of variance (ANOVA) using the statistical software package R. Figures in brackets highlight standard error.

**Table S2:** Effect of fertiliser treatment on mean grass DM yield, over three cuts of the second year (2019) of the growth trial.

| Treatment      | First cut                    | Second cut                  | Third cut                    |
|----------------|------------------------------|-----------------------------|------------------------------|
| DM yield kg/ha |                              |                             |                              |
| Eco P          | 205.4 <sup>b</sup> (88.1)    | 838.4 <sup>b</sup> (224.01) | 1590.5 <sup>b</sup> (16.65)  |
| Eco P Comp     | 1555.2 <sup>a</sup> (57.9)   | 2604.5 <sup>a</sup> (25.2)  | 3115 <sup>ab</sup> (459.15)  |
| C Comp         | 2233.6 <sup>a</sup> (364.57) | 3045.4 <sup>a</sup> (119.2) | 3960 <sup>a</sup> (498.66)   |
| Control        | 186.6 <sup>b</sup> (27.32)   | 1049.8 <sup>b</sup> (90.58) | 1749.9 <sup>b</sup> (452.11) |

Within each column (harvests) shared letters denote no statistical difference occurring at  $p > 0.05$ , data was analysed using a repeated measure one-way analysis of variance (ANOVA) using the statistical software package R. Figures in brackets highlight standard error.

**Table S3:** Effect of fertiliser treatment on mean grass DM yield, over three cuts of the third year (2020) of the growth trial.

| Treatment      | First cut                   | Second cut                   | Third cut                   |
|----------------|-----------------------------|------------------------------|-----------------------------|
| DM yield kg/ha |                             |                              |                             |
| Eco P          | 1562.5 <sup>c</sup> (144.7) | 194.4 <sup>c</sup> (6.94)    | 272.2 <sup>c</sup> (13.96)  |
| Eco P Comp     | 2744.3 <sup>b</sup> (54.7)  | 1062.5 <sup>b</sup> (46.94)  | 902.3 <sup>b</sup> (198.55) |
| C Comp         | 4302 <sup>a</sup> (273.2)   | 2529.41 <sup>a</sup> (45.18) | 2480.3 <sup>a</sup> (98.94) |
| Control        | 1493.4 <sup>c</sup> (36.83) | 213.24 <sup>c</sup> (37.31)  | 2044.2 <sup>c</sup> (45.07) |

Within each column (harvests) shared letters denote no statistical difference occurring at  $p > 0.05$ , data was analysed using a repeated measure one-way analysis of variance (ANOVA) using the statistical software package R. Figures in brackets highlight standard error at.

**Table S4:** Yearly cumulative effect of fertiliser treatment on mean grass DM yield, and three-year cumulative grass DM yield.

| Treatment      | Year 1                        | Year 2                       | year 3                      | Trial cumulative             |
|----------------|-------------------------------|------------------------------|-----------------------------|------------------------------|
| Yield DM kg/ha |                               |                              |                             |                              |
| Eco P          | 4586.8 <sup>a</sup> (1289)    | 2634.4 <sup>c</sup> (400.3)  | 2084.7 <sup>c</sup> (435.5) | 9305.9 <sup>c</sup> (759.1)  |
| Eco P Comp     | 8304.3 <sup>b</sup> (1995.8)  | 7274.9 <sup>b</sup> (459.15) | 4899.8 <sup>b</sup> (555.6) | 20479 <sup>b</sup> (1008)    |
| C Comp         | 98939.5 <sup>b</sup> (1995.8) | 9239.17 <sup>a</sup> (498.6) | 9875.6 <sup>a</sup> (526.5) | 28985.3 <sup>a</sup> (206.4) |
| Control        | 4304.2 <sup>a</sup> (1210.2)  | 2986.4 <sup>c</sup> (452.1)  | 2044.2 <sup>c</sup> (45.07) | 9334.95 <sup>c</sup> (452.1) |

Within each column (harvests) shared letters denote no statistical difference occurring at  $p > 0.05$ , data was analysed using a repeated measure one-way analysis of variance (ANOVA) using the statistical software package R. Figures in brackets highlight standard error.
